# Supplementary material
Source: PubMed Central journal article supplement (PMC5525156)
Supplement: NIHMS873284-supplement-Supplementary_Material.pdf [file NIHMS873284-supplement-Supplementary_Material.pdf]

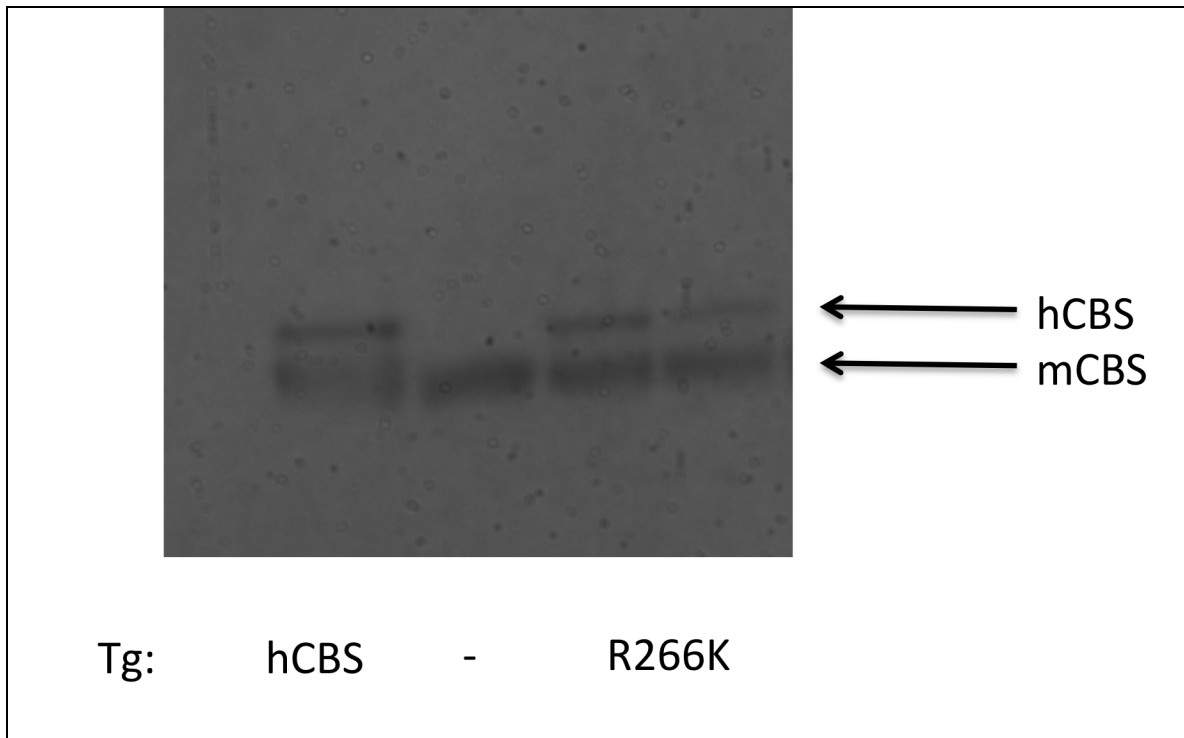

**Supplemental Figure S1.** CBS protein in offspring of *Tg-R266K* founder. Three offspring of the original founder backcrossed to C57BL/6J were analyzed for liver CBS expression by Western blot. Transgene status is indicated at bottom. All mice were on Zinc-water for 10 days before livers were harvested. Human CBS runs slightly slower than mouse CBS due to the HA epitope tag inserted at the N-terminus.

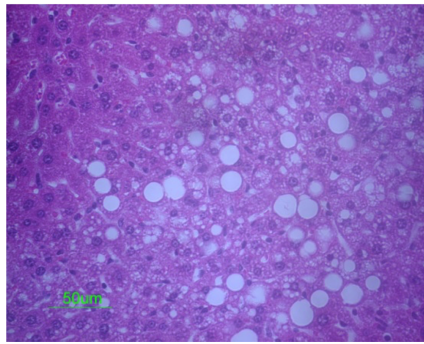

Tg-R266K *Cbs*<sup>-/-</sup>

22 days old

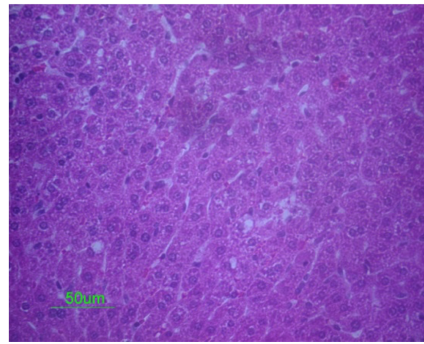

Tg-R266K *Cbs*<sup>+/-</sup>

22 days old

**Supplemental Figure S2.** H and E staining of the livers of 22 day old *Tg-R266K Cbs*<sup>-/-</sup> and *Tg-R266K Cbs*<sup>+/-</sup> mice.
